# Supplementary material for: Spatio-temporal expression pattern of Raffinose Synthase genes determine the levels of Raffinose Family Oligosaccharides in peanut (Arachis hypogaea L.) seed
Source: PubMed Central journal article supplement (PMC9842710; doi:10.1038/s41598-023-27890-z), 2023-01-16
Supplement: 41598_2023_27890_MOESM1_ESM.pdf [file 41598_2023_27890_MOESM1_ESM.pdf]

## Supplementary Information

### **Spatio-temporal expression pattern of Raffinose Synthase genes determine the levels of Raffinose Family Oligosaccharides in peanut (*Arachis hypogaea* L.) seed**

**Rajarshi Sanyal<sup>1,2</sup>, Bhubaneswar Pradhan<sup>1,#</sup>, Danish Md. Jawed<sup>1</sup>, Kishor U. Tribhuvan<sup>1</sup>, Anil Dahuja<sup>2</sup>, Madan Kumar<sup>1</sup>, Narendra Kumar<sup>3</sup>, Gyan P. Mishra<sup>4</sup>, Chet Ram<sup>5</sup>, Mahesh Kumar Mahatma<sup>6</sup>, Binay K. Singh<sup>1</sup>, Satendra K. Mangrauthia<sup>7</sup>, Anil K. Singh<sup>8</sup>, T.R. Sharma<sup>1,##</sup>, Arunava Pattanayak<sup>1</sup>, and Sujit K. Bishi<sup>1\*</sup>**

<sup>1</sup>School of Genomics and Molecular Breeding, ICAR–Indian Institute of Agricultural Biotechnology, Garhkhatanga, Ranchi-834003, India

<sup>2</sup>Division of Biochemistry, ICAR-Indian Agricultural Research Institute. New Delhi-110012, India

<sup>3</sup>Regional Research Station, ICAR-Directorate of Groundnut Research, Bikaner-334006, India

<sup>4</sup>Division of Genetics, ICAR-Indian Agricultural Research Institute. New Delhi-110012, India

<sup>5</sup> ICAR-Central Institute for Arid Horticulture, Beechwal, Bikaner-334006, India

<sup>6</sup> ICAR-National Research Centre on Seed Spices, Beawar Road, Ajmer-305206, India

<sup>7</sup> ICAR-Indian Institute of Rice Research, Hyderabad-500030, India

<sup>8</sup> ICAR-National Institute of Plant Biotechnology, New Delhi-110012, India

Present address

<sup>#</sup> Department of Agricultural Biotechnology, Faculty Centre for Integrated Rural Development and Management, Ramakrishna Mission Vivekananda Educational and Research Institute, Kolkata-700103, India

<sup>##</sup> Career Point University, Alaniya, Kota-325003, India

**Corresponding author: Sujit K Bishi**

**Table S1. Complete library QC status of the peanut samples**

| Sl. No. | Well | Sample ID     | Qubit conc.<br>(ng/ $\mu$ l) | Size (bp) | Conc. (nmol) |
|---------|------|---------------|------------------------------|-----------|--------------|
| 1       | B2   | TG37A_S1_R1   | 13.1                         | 530       | 37.45        |
| 2       | C1   | TG37A_S1_R2   | 11.8                         | 498       | 35.90        |
| 3       | A2   | TG37A_S1_R3   | 8                            | 541       | 22.41        |
| 4       | B1   | TG37A_S2_R1   | 8.72                         | 493       | 26.80        |
| 5       | C3   | TG37A_S2_R2   | 3.82                         | 505       | 11.46        |
| 6       | H1   | TG37A_S2_R3   | 7.64                         | 536       | 21.60        |
| 7       | G2   | Girnar2_S1_R1 | 4.36                         | 548       | 12.05        |
| 8       | B3   | Girnar2_S1_R2 | 29.2                         | 503       | 87.96        |
| 9       | E1   | Girnar2_S1_R3 | 11                           | 536       | 31.09        |
| 10      | H2   | Girnar2_S2_R1 | 7.26                         | 509       | 21.61        |
| 11      | A3   | Girnar2_S2_R2 | 18.9                         | 540       | 53.03        |
| 12      | D1   | Girnar2_S2_R3 | 9.5                          | 509       | 28.28        |
| 13      | F2   | GG7_S1_R1     | 43.4                         | 512       | 128.43       |
| 14      | D2   | GG7_S1_R2     | 23.4                         | 547       | 64.82        |
| 15      | C2   | GG7_S1_R3     | 7.38                         | 522       | 21.42        |
| 16      | E2   | GG7_S2_R1     | 19.9                         | 503       | 59.94        |
| 17      | G1   | GG7_S2_R2     | 20.2                         | 547       | 55.95        |
| 18      | F1   | GG7_S2_R3     | 18.2                         | 527       | 52.33        |

Qubit concentrations above 2ng/ $\mu$ l or 10nmol signifies the permissible range. Data was analyzed using TapeStation Analysis Software 3.2 in Agilent 4150 TapeStation System. R1, R2 and R3 indicates the three replications in each sample.

**Table S2. Details of the primers selected for reference gene identification and qPCR analysis**

| Sl. No. | Gene name      | Tentative annotation              | Primer sequence                                         | Amplicon length (bp) |
|---------|----------------|-----------------------------------|---------------------------------------------------------|----------------------|
| 1       | <i>ADH3</i>    | Alcohol dehydrogenase class III   | F: GACGCTTGCGAGATCAACA<br>R: AACCGGACAACCACCACATG       | 140                  |
| 2       | <i>ACTIN11</i> | Actin 11                          | F: ATGCTAGTGGTCGTACAACCTGG<br>R: CTAGACGAAGGATAGCATGTGG | 108                  |
| 3       | <i>ELF1B</i>   | Elongation factor1-beta           | F: AAGCTTCCCTGGCAAAGCTCAA<br>R: TTCCTCAGCTGCCTTCTTATCC  | 154                  |
| 4       | <i>G6PD</i>    | Glucose 6-phosphate-dehydrogenase | F: ACCATTCCAGAGGCTTATGAGC<br>R: AAGGGAGTGACTTGAACCTCTCC | 151                  |
| 5       | <i>ACTIN1</i>  | Actin1                            | F: TGGTCTCGGTTTCCTGAGTT<br>R: AATACCACTCCAAAGCAAACG     | 114                  |
| 6       | <i>UBI1</i>    | Polyubiquitin                     | F: TCTTGTCCTCCGTCTTAGGG<br>R: AGCAAGGGTCCCTTCCATCTT     | 196                  |
| 7       | <i>UBC1</i>    | Ubiquitin C                       | F: AAGCCGAAGAAGATCAAGCAC<br>R: GGTTAGCCATGAAGGTTCCA     | 145                  |

|    |                |                                    |                                                         |     |
|----|----------------|------------------------------------|---------------------------------------------------------|-----|
| 8  | <i>AhGolS4</i> | Galactinol Synthase (arahy.KNQB38) | F: TTGGGAGTTTGTGGAGTATAGC<br>R: CCTTAGGCCATTGAACCTTATCA | 203 |
| 9  | <i>AhGolS6</i> | Galactinol Synthase (arahy.T7DX97) | F: TGCCTTCGTGACTTTCCTTG<br>R: GATGTTGCGGTGTTCTTGAG      | 142 |
| 10 | <i>AhRS14</i>  | Raffinose Synthase (arahy.1YYJ7Z)  | F: GTGTACATGGTGAAAGACCAC<br>R: GGATTGAATTGAGCCTCCAGA    | 186 |
| 11 | <i>AhRS4</i>   | Raffinose Synthase (arahy.WB441U)  | F: AGTGTACATGGTGAAAAACCAA<br>R: GGATTGAATTGAGCCTCCAGA   | 187 |
| 12 | <i>AhRS6</i>   | Raffinose Synthase (arahy.82P426)  | F: GATGGTGTAAGGTAGAGAAGAGG<br>R: TATCACCGGAACTGAAGCAC   | 194 |
| 13 | <i>AhRSV</i>   | Raffinose Synthase (arahy.AY7U99)  | F: TCAACTCACAGGGCCTATTTC<br>R: CACCTGAAAGCTGGTTCTTATTG  | 104 |
| 14 | <i>AhRS8</i>   | Raffinose Synthase (arahy.PF1JUH)  | F: GAACATGCTCAACTCTGGC<br>R: TCACACCCAACCCATTAATCT      | 149 |
| 15 | <i>AhRS3</i>   | Raffinose Synthase (arahy.SCX26U)  | F: TGAACATGCTTAACTCCGGT<br>R: CCACATCCACCCCATTAATCT     | 150 |
| 16 | <i>AhSS7</i>   | Stachyose Synthase (arahy.T832D6)  | F: TGGGATCCTAAAGAACACACG<br>R: ACTGCCACAAAGCTGAAGA      | 242 |

**Table S3. Ranking of genes according to their stability value or standard deviation by integration of different ranking methods**

| Genes            | Comprehensive Ranking     | Delta Ct      | NormFinder      | GeNorm          | BestKeeper | Overall Ranking |
|------------------|---------------------------|---------------|-----------------|-----------------|------------|-----------------|
|                  | Geomean of ranking values | Average of SD | Stability value | Stability value | SD         |                 |
| <i>AhUBI1</i>    | 1.41                      | 1.26          | 0.128           | 0.256           | 0.87       | 1               |
| <i>AhADH3</i>    | 1.78                      | 1.30          | 0.128           | 0.256           | 0.89       | 2               |
| <i>AhActin1</i>  | 2.28                      | 1.34          | 0.378           | 0.428           | 0.83       | 3               |
| <i>AhG6PD</i>    | 3.94                      | 1.57          | 0.963           | 0.703           | 0.89       | 4               |
| <i>AhUBC1</i>    | 4.47                      | 1.61          | 0.868           | 0.883           | 0.89       | 5               |
| <i>AhActin11</i> | 6.24                      | 2.54          | 2.316           | 1.350           | 2.25       | 6               |
| <i>AhELF1B</i>   | 6.74                      | 2.87          | 2.693           | 1.784           | 2.17       | 7               |

Different ranking tools were integratively used in RefFinder software to select the best reference gene as endogenous control. *Ah* stands for *Arachis hypogaea*, UBI1 = Polyubiquitin, ADH3 = Alcohol dehydrogenase class III, ELF1B = Elongation factor1-beta, G6PD = Glucose 6-phosphatedehydrogenase, UBC1 = Ubiquitin C, SD = Standard Deviation.

**Table S4. Distribution of genes involved in biosynthesis of Raffinose Family Oligosaccharides in *Arachis hypogaea* chromosome and size of each chromosome.**

| Family              | Gene Name      | Gene ID                 |              | Chromosome | Start (bp) | End (bp) |
|---------------------|----------------|-------------------------|--------------|------------|------------|----------|
|                     |                | Peanut Genome Resources | PeanutBase   |            |            |          |
| Galactinol Synthase | <i>AhGolS1</i> | AH06G04780              | arahy.N6N04K | A6         | 7372956    | 7374154  |
|                     | <i>AhGolS2</i> | AH09G11340              | arahy.9HBV2U | A9         | 19359461   | 19361880 |
|                     | <i>AhGolS3</i> | AH09G11360              | arahy.FK4NNE | A9         | 19369230   | 19373832 |

|                           |                |            |              |    |           |           |
|---------------------------|----------------|------------|--------------|----|-----------|-----------|
|                           | <i>AhGols4</i> | AH09G12530 | arahy.KNQB38 | A9 | 23295792  | 23297552  |
|                           | <i>AhGols5</i> | AH16G08210 | arahy.HZ3A81 | B6 | 13919203  | 13921118  |
|                           | <i>AhGols6</i> | AH16G09600 | arahy.T7DX97 | B6 | 15938464  | 15940252  |
|                           | <i>AhGols7</i> | AH19G14790 | arahy.96F7ZV | B9 | 24050668  | 24052744  |
|                           | <i>AhGols8</i> | AH19G14820 | arahy.96F7ZV | B9 | 24062000  | 24065052  |
|                           | <i>AhGols9</i> | AH19G16350 | arahy.B1GHBV | B9 | 29335476  | 29337107  |
| <b>Raffinose Synthase</b> | <i>AhRS1</i>   | AH01G25000 | arahy.UR837P | A1 | 97414835  | 97417909  |
|                           | <i>AhRS2</i>   | AH03G22950 | arahy.7F6VM6 | A3 | 43550202  | 43555938  |
|                           | <i>AhRS3</i>   | AH03G23470 | arahy.SCX26U | A3 | 44115868  | 44122524  |
|                           | <i>AhRS4</i>   | AH03G23920 | arahy.WB441U | A3 | 46419360  | 46431663  |
|                           | <i>AhRS5</i>   | AH05G24120 | arahy.B3XDAM | A5 | 91409141  | 91415144  |
|                           | <i>AhRS6</i>   | AH06G01900 | arahy.82P426 | A6 | 3781168   | 3785408   |
|                           | <i>AhRS7</i>   | AH07G00130 | arahy.SCX26U | A7 | 363064    | 365523    |
|                           | <i>AhRS8</i>   | AH07G00140 | arahy.PF1JUH | A7 | 365572    | 368992    |
|                           | <i>AhRS9</i>   | AH07G01370 | arahy.C3FF4U | A7 | 1289070   | 1292937   |
|                           | <i>AhRS10</i>  | AH07G17720 | No hits      | A7 | 51980576  | 51981067  |
|                           | <i>AhRS11</i>  | AH09G16320 | arahy.UR837P | A9 | 53685525  | 53685821  |
|                           | <i>AhRS12</i>  | AH11G32960 | arahy.SM3TC1 | B1 | 145745289 | 145748844 |
|                           | <i>AhRS13</i>  | AH13G01440 | arahy.4X3ZEJ | B3 | 1834889   | 1840567   |
|                           | <i>AhRS14</i>  | AH13G26910 | arahy.1YYJ7Z | B3 | 48501704  | 48514269  |
|                           | <i>AhRS15</i>  | AH15G31330 | arahy.DBZB80 | B5 | 145581591 | 145586985 |
|                           | <i>AhRS16</i>  | AH16G04370 | arahy.3HRB74 | B6 | 8188588   | 8192653   |
|                           | <i>AhRS17</i>  | AH17G01490 | arahy.C3FF4U | B7 | 1941587   | 1945308   |
| <b>Stachyose Synthase</b> | <i>AhSS1</i>   | AH01G31080 | arahy.T832D6 | A1 | 105403482 | 105403784 |
|                           | <i>AhSS2</i>   | AH06G04600 | arahy.RWK4UY | A6 | 7153076   | 7156467   |
|                           | <i>AhSS3</i>   | AH06G04610 | arahy.3E1AF2 | A6 | 7161436   | 7164458   |
|                           | <i>AhSS4</i>   | AH07G07050 | arahy.3E1AF2 | A7 | 7460657   | 7460887   |
|                           | <i>AhSS5</i>   | AH13G25550 | arahy.TR51Z4 | B3 | 42936278  | 42937422  |
|                           | <i>AhSS6</i>   | AH15G16580 | arahy.Y2LGUI | B5 | 74218184  | 74218342  |
|                           | <i>AhSS7</i>   | AH16G08010 | arahy.T832D6 | B6 | 13618714  | 13622241  |
|                           | <i>AhSS8</i>   | AH16G08020 | arahy.Y2LGUI | B6 | 13636266  | 13639347  |

| <b>Chromosome</b>  | <b>A1</b> | <b>A2</b> | <b>A3</b> | <b>A4</b> | <b>A5</b> | <b>A6</b> | <b>A7</b> | <b>A8</b> | <b>A9</b> | <b>A10</b> |
|--------------------|-----------|-----------|-----------|-----------|-----------|-----------|-----------|-----------|-----------|------------|
| <b>Length (Mb)</b> | 111.624   | 99.792    | 143.207   | 122.065   | 116.167   | 109.265   | 83.117    | 51.955    | 121.059   | 114.520    |
| <b>Chromosome</b>  | <b>B1</b> | <b>B2</b> | <b>B3</b> | <b>B4</b> | <b>B5</b> | <b>B6</b> | <b>B7</b> | <b>B8</b> | <b>B9</b> | <b>B10</b> |
| <b>Length (Mb)</b> | 149.380   | 122.214   | 150.766   | 135.086   | 153.119   | 153.789   | 132.999   | 136.777   | 159.155   | 140.659    |

**Table S5. Sugar profile and content of RFOs (g 100 g<sup>-1</sup>) in the dry seeds of peanut**

| Genotypes    | Agronomic Group | Inositol (g 100 g <sup>-1</sup> ) | Glucose (g 100 g <sup>-1</sup> ) | Sucrose (g 100 g <sup>-1</sup> ) | Raffinose (g 100 g <sup>-1</sup> ) | Stachyose (g 100 g <sup>-1</sup> ) | Total RFOs (g 100 g <sup>-1</sup> ) |
|--------------|-----------------|-----------------------------------|----------------------------------|----------------------------------|------------------------------------|------------------------------------|-------------------------------------|
| GG 20        | VB              | 0.06 cd                           | 0.003 b                          | 5.27 e                           | 0.06 b                             | 0.49 b                             | 0.55 bc                             |
| GG 5         | SB              | 0.08 ab                           | 0.006 a                          | 7.08 a                           | 0.09 a                             | 0.43 c                             | 0.52 c                              |
| GG 7         | SB              | 0.09 a                            | 0.001 b                          | 6.32 bc                          | 0.06 b                             | 0.34 d                             | 0.40 d                              |
| Girnar 2     | VB              | 0.04 e                            | 0.001 b                          | 6.26 c                           | 0.07 ab                            | 0.55 ab                            | 0.62 ab                             |
| Girnar 3     | SB              | 0.04 de                           | 0.008 a                          | 6.06 d                           | 0.05 b                             | 0.52 b                             | 0.58 bc                             |
| TG37A        | SB              | 0.07 bc                           | 0.001 b                          | 6.36 b                           | 0.07 ab                            | 0.60 a                             | 0.67 a                              |
| C.V. (%)     |                 | 15.48                             | 32.61                            | 0.82                             | 16.65                              | 6.60                               | 7.14                                |
| SEm±         |                 | 0.01                              | 0.001                            | 0.01                             | 0.01                               | 0.02                               | 0.02                                |
| S.E.D.       |                 | 0.01                              | 0.001                            | 0.04                             | 0.01                               | 0.03                               | 0.03                                |
| LSD (p<0.05) |                 | 0.02                              | 0.002                            | 0.09                             | 0.02                               | 0.06                               | 0.07                                |
| ProbF        |                 | 0.000**                           | 0.000**                          | 0.000**                          | 0.028*                             | 0.000**                            | 0.000**                             |

All values are mean of three replications. Mean values with different letters within the same column are statistically different (p-value < 0.05). VB = Virginia Bunch, SB = Spanish Bunch C.V. (%) = Coefficient of Variation, S.E.M = Standard Error of the Mean, S.E.D. = Standard Error of Difference, LSD = Least Significant Difference, ProbF = Probability from an *F* distribution (\* denotes significant and \*\* denotes highly significant).

**Table S6. Glucose, Sucrose and RFOs content (g 100 g<sup>-1</sup>) in the maturing stage (S1) and matured stage (S2) of seeds in contrast peanut genotypes.**

| Variety      | Seed Stage | D-Glucose (g 100g <sup>-1</sup> ) | Sucrose (g 100g <sup>-1</sup> ) | Total RFOs (g 100g <sup>-1</sup> ) |
|--------------|------------|-----------------------------------|---------------------------------|------------------------------------|
| TG37A        | S1         | 0.05 ± 0.002                      | 10.23 ± 0.023                   | 0.54 ± 0.023                       |
|              | S2         | 0.04 ± 0.002                      | 6.09 ± 0.030                    | 0.72 ± 0.011                       |
| GG7          | S1         | 0.06 ± 0.002                      | 9.55 ± 0.030                    | 0.26 ± 0.013                       |
|              | S2         | 0.06 ± 0.001                      | 6.09 ± 0.011                    | 0.47 ± 0.013                       |
| Girnar 2     | S1         | 0.12 ± 0.013                      | 10.23 ± 0.026                   | 0.49 ± 0.016                       |
|              | S2         | 0.09 ± 0.003                      | 6.34 ± 0.027                    | 0.64 ± 0.018                       |
| C.V. (%)     |            | 14.39                             | 0.54                            | 5.42                               |
| SEm±         |            | 0.01                              | 0.03                            | 0.02                               |
| S.E.D.       |            | 0.01                              | 0.04                            | 0.02                               |
| LSD (p<0.05) |            | 0.02                              | 0.08                            | 0.05                               |
| ProbF        |            | 0.000**                           | 0.000**                         | 0.000**                            |

All values are mean of three replications ± Standard Error. S1 = maturing seed stage, S2 = matured seed stage, C.V. (%) = Coefficient of Variation, S.E.M = Standard Error of the Mean, S.E.D. = Standard Error of Difference, LSD = Least Significant Difference, ProbF = Probability from an *F* distribution (\*\* denotes highly significant).

**Table S7. Number of differentially expressed genes.**

| Condition                | Significantly Expressed Genes | Up Regulated Genes | Down Regulated genes |
|--------------------------|-------------------------------|--------------------|----------------------|
| GG7_S2 vs GG7_S1         | 2,321                         | 622                | 1699                 |
| TG37A_S1 vs GG7_S1       | 6,341                         | 2,690              | 3,651                |
| TG37A_S2 vs GG7_S2       | 8,149                         | 2,951              | 5,198                |
| Girnar2_S2 vs Girnar2_S1 | 2,629                         | 416                | 2,213                |
| TG37A_S1 vs Girnar2_S1   | 5,015                         | 1,775              | 3,240                |

|                        |       |       |       |
|------------------------|-------|-------|-------|
| TG37A_S2 vs Girnar2_S2 | 4,461 | 1,379 | 3,082 |
| TG37A_S2 vs TG37A_S1   | 2,247 | 301   | 1,946 |

Seed maturity stages are denoted by S1 (maturing stage) and S2 (matured stage). Total number of tested genes were 62,987. The data is the average of three biological replicates.

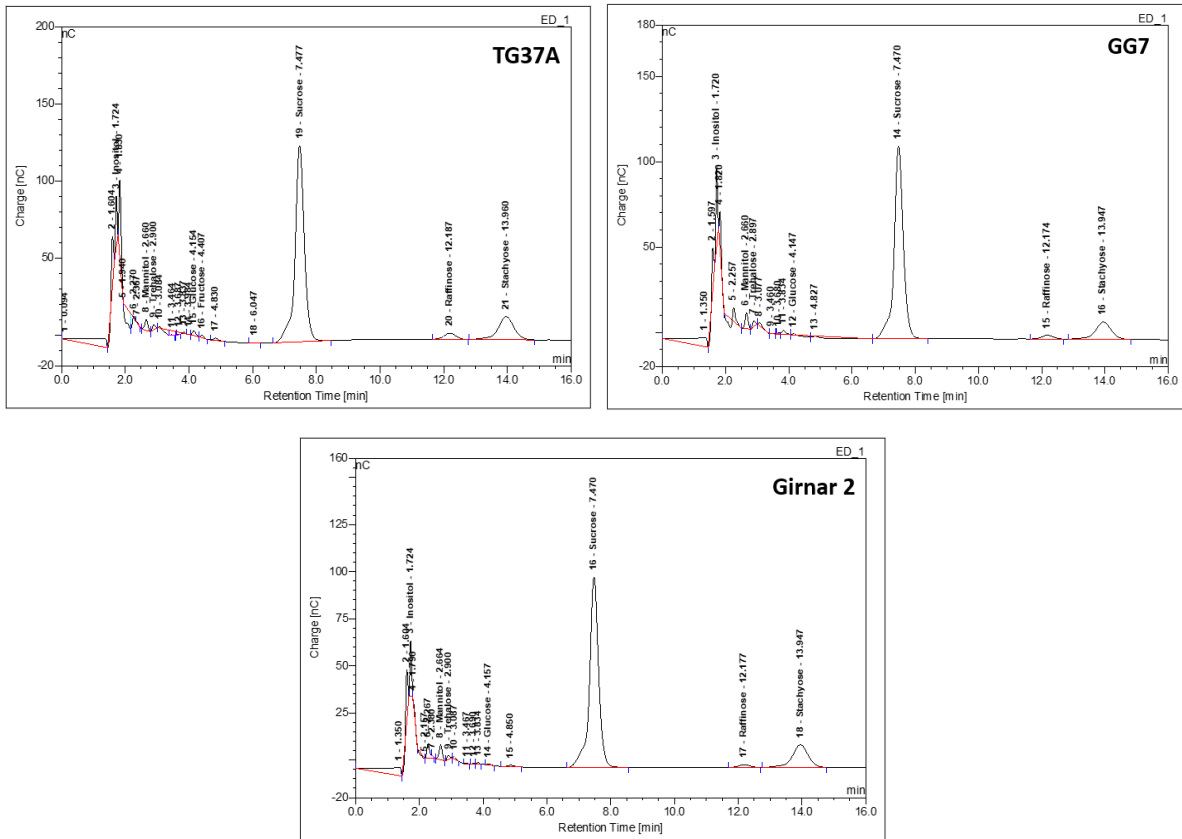

**Fig. S1. Ion Chromatogram of peanut seed samples of contrast genotypes.** Each peak represents the detected compounds and the values indicate the retention time. Data integration was done using Chormeleon software.

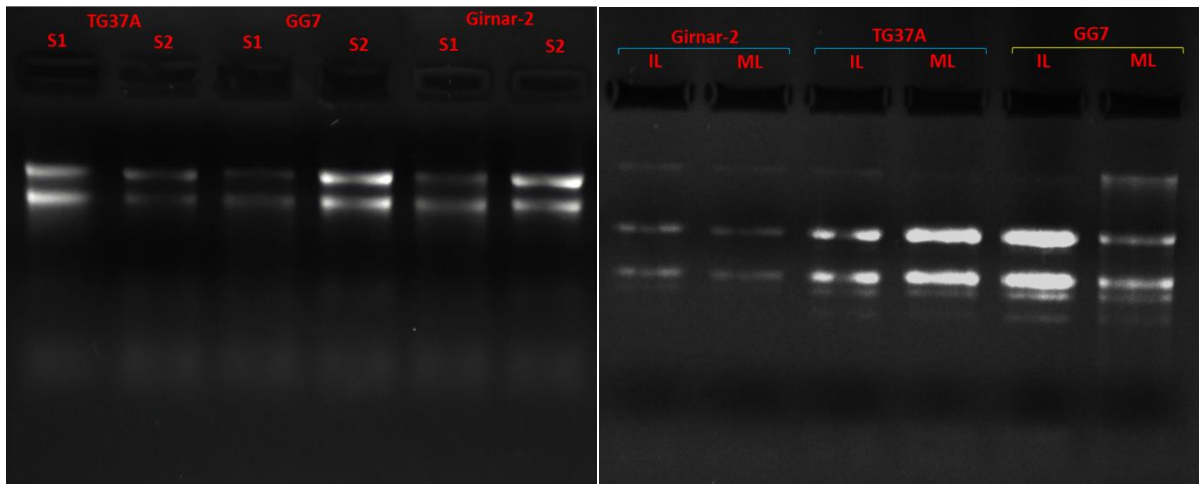

**Fig. S2. Qualitative assessment of total RNA.** The eluted RNA samples were run on 1.3% denaturing agarose gel electrophoresis and 28S, 18S, and 5S rRNA bands were separated, revealing the integrity of the RNA. **S1** = maturing seed, **S2** = matured seed, **IL** = immature leaf, **ML** = mature leaf.

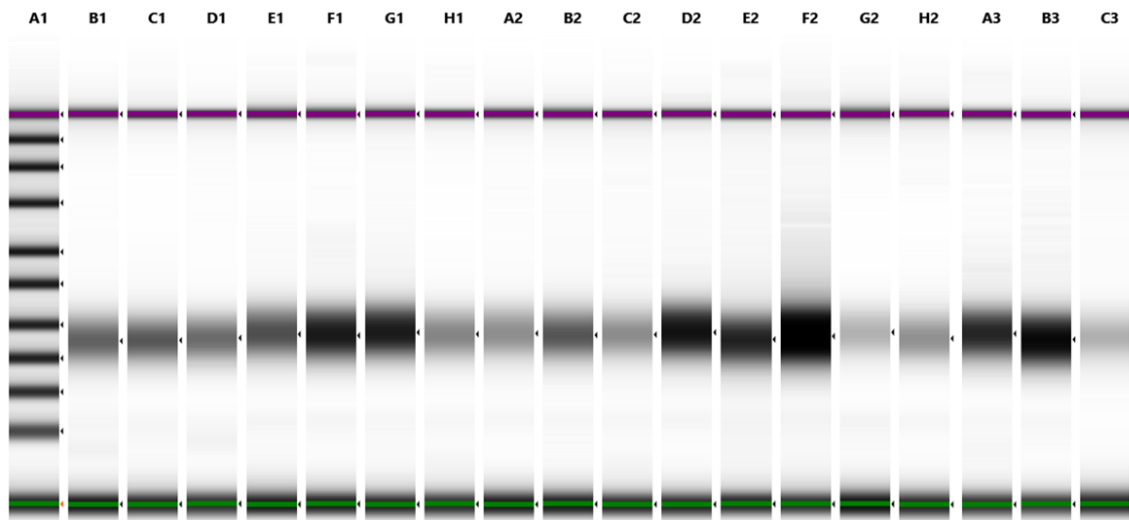

**Fig. S3. Gel profile of cDNA libraries.** cDNA libraries of three peanut genotypes at two seed stages qualified the criteria based on the presence of a broad peak in the range of 300bp to 1000bp, with an average size of 400 – 600 bp in the Agilent 4150 TapeStation system **A1** = Ladder, **B1** to **C3** are the sample wells.

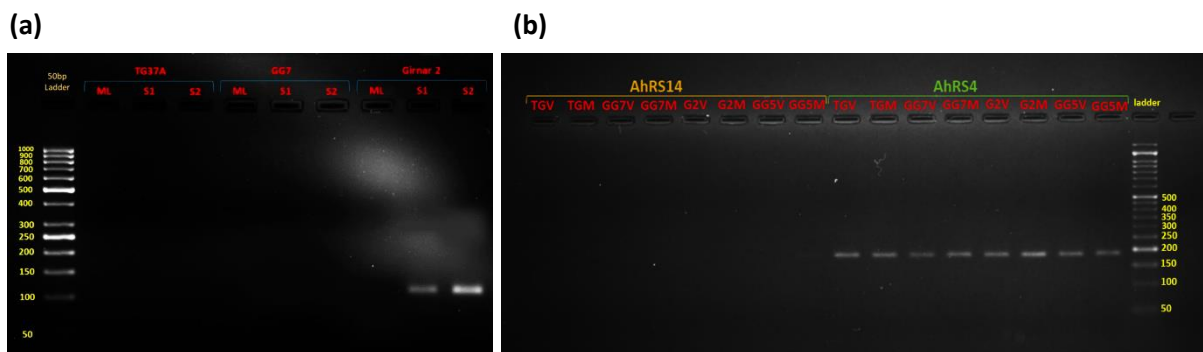

**Fig. S4. Agarose gel electrophoresis images of different genes across peanut tissue samples.** (a) *AY7U99* or *AhRSV* primer band pattern in Matured Leaf (ML), Maturing (S1) seed, Matured (S2) seed stage of Spanish genotypes (TG37A and GG7) and Virginia genotype (Girnar 2). Spanish genotypes do not show any expression while Virginia genotype shows seed-specific expression when run on 3% denaturing agarose gel. (b) *AhRS4* and *AhRS14* gene present on chromosome A3/B3 shows a differential expression pattern. *AhRS4* shows expression in the leaf while *AhRS14* does not. Leaf samples at two different stages, vegetative (V) and mature (M) in four peanut genotypes - TG37A (TG), GG7, Girnar 2 (G2), and GG5 are shown here. Samples were run on 3% denaturing agarose gel. A 50bp DNA ladder was used.



| TG37A vs GG7 (S1) |                    |                                         |                   |         | TG37A vs GG7 (S2) |                    |                                         |                   |         | TG37A vs Girnar2 (S1) |                    |                                         |                   |         |
|-------------------|--------------------|-----------------------------------------|-------------------|---------|-------------------|--------------------|-----------------------------------------|-------------------|---------|-----------------------|--------------------|-----------------------------------------|-------------------|---------|
| Gene              | $\Delta\Delta C_T$ | Fold Change ( $2^{-\Delta\Delta C_T}$ ) | log 2 Fold Change |         | Gene              | $\Delta\Delta C_T$ | Fold Change ( $2^{-\Delta\Delta C_T}$ ) | log 2 Fold Change |         | Gene                  | $\Delta\Delta C_T$ | Fold Change ( $2^{-\Delta\Delta C_T}$ ) | log 2 Fold Change |         |
|                   |                    |                                         | qPCR              | RNA-Seq |                   |                    |                                         | qPCR              | RNA-Seq |                       |                    |                                         | qPCR              | RNA-Seq |
| AhGolS4           | -2.065             | 4.185                                   | 2.065             | 2.848   | AhGolS4           | -0.251             | 1.190                                   | 0.251             | -0.048  | AhGolS4               | -8.702             | 416.556                                 | 8.702             | 6.021   |
| AhGolS6           | -6.015             | 64.657                                  | 6.015             | 3.801   | AhGolS6           | -1.432             | 2.699                                   | 1.432             | 0.488   | AhGolS6               | -3.185             | 9.093                                   | 3.185             | 2.211   |
| AhRS14            | -7.257             | 152.973                                 | 7.257             | 6.340   | AhRS14            | -7.341             | 162.078                                 | 7.341             | 4.575   | AhRS14                | -1.758             | 3.383                                   | 1.758             | 5.897   |
| AhRS4             | -2.114             | 4.329                                   | 2.114             | 7.165   | AhRS4             | -4.217             | 18.592                                  | 4.217             | 6.229   | AhRS4                 | 0.680              | 0.624                                   | -0.680            | 5.909   |
| AhRS6             | -0.648             | 1.567                                   | 0.648             | 1.168   | AhRS6             | 0.976              | 0.508                                   | -0.976            | -0.918  | AhRS6                 | -7.009             | 128.816                                 | 7.009             | 7.482   |
| AY7U99            | -2.546             | 5.840                                   | 2.546             | 0.000   | AY7U99            | -3.577             | 11.930                                  | 3.577             | 1.896   | AY7U99                | 5.961              | 0.016                                   | -5.961            | -10.466 |
| AhRS8             | -3.699             | 12.984                                  | 3.699             | 1.467   | AhRS8             | -1.743             | 3.347                                   | 1.743             | -3.546  | AhRS8                 | 0.242              | 0.845                                   | -0.242            | -0.341  |
| AhRS3             | -5.220             | 37.269                                  | 5.220             | 3.087   | AhRS3             | -1.180             | 2.266                                   | 1.180             | -2.524  | AhRS3                 | 0.162              | 0.894                                   | -0.162            | -0.067  |
| AhSS7             | -3.834             | 14.264                                  | 3.834             | 0.803   | AhSS7             | 0.888              | 0.540                                   | -0.888            | -2.187  | AhSS7                 | 1.082              | 0.472                                   | -1.082            | -0.101  |

**A** **B** **C**

| TG37A vs Girnar2 (S2) |                    |                                         |                   |         | Girnar2 vs GG7 (S1) |                    |                                         |                   |         | Girnar2 vs GG7 (S2) |                    |                                         |                   |         |
|-----------------------|--------------------|-----------------------------------------|-------------------|---------|---------------------|--------------------|-----------------------------------------|-------------------|---------|---------------------|--------------------|-----------------------------------------|-------------------|---------|
| Gene                  | $\Delta\Delta C_T$ | Fold Change ( $2^{-\Delta\Delta C_T}$ ) | log 2 Fold Change |         | Gene                | $\Delta\Delta C_T$ | Fold Change ( $2^{-\Delta\Delta C_T}$ ) | log 2 Fold Change |         | Gene                | $\Delta\Delta C_T$ | Fold Change ( $2^{-\Delta\Delta C_T}$ ) | log 2 Fold Change |         |
|                       |                    |                                         | qPCR              | RNA-Seq |                     |                    |                                         | qPCR              | RNA-Seq |                     |                    |                                         | qPCR              | RNA-Seq |
| AhGolS4               | -2.954             | 7.748                                   | 2.954             | 1.582   | AhGolS4             | 6.637              | 0.010                                   | -6.637            | -3.176  | AhGolS4             | 2.703              | 0.154                                   | -2.703            | -1.634  |
| AhGolS6               | 0.254              | 0.839                                   | -0.254            | -0.997  | AhGolS6             | -2.830             | 7.111                                   | 2.830             | 1.594   | AhGolS6             | -1.686             | 3.217                                   | 1.686             | 1.485   |
| AhRS14                | 1.684              | 0.311                                   | -1.684            | 0.397   | AhRS14              | -5.499             | 45.219                                  | 5.499             | 0.585   | AhRS14              | -9.025             | 520.779                                 | 9.025             | 4.184   |
| AhRS4                 | 2.440              | 0.184                                   | -2.440            | 0.501   | AhRS4               | -2.794             | 6.937                                   | 2.794             | 1.585   | AhRS4               | -6.657             | 100.915                                 | 6.657             | 5.769   |
| AhRS6                 | -6.703             | 104.187                                 | 6.703             | 5.969   | AhRS6               | 6.361              | 0.012                                   | -6.361            | -6.316  | AhRS6               | 7.679              | 0.005                                   | -7.679            | -6.888  |
| AY7U99                | 8.657              | 0.002                                   | -8.657            | -8.981  | AY7U99              | -8.507             | 363.742                                 | 8.507             | 7.462   | AY7U99              | -12.234            | 4816.121                                | 12.234            | 7.831   |
| AhRS8                 | 0.813              | 0.569                                   | -0.813            | -4.072  | AhRS8               | -3.941             | 15.357                                  | 3.941             | 1.825   | AhRS8               | -2.555             | 5.878                                   | 2.555             | 0.531   |
| AhRS3                 | 2.101              | 0.233                                   | -2.101            | -3.444  | AhRS3               | -5.382             | 41.701                                  | 5.382             | 3.156   | AhRS3               | -3.282             | 9.725                                   | 3.282             | 0.920   |
| AhSS7                 | 3.494              | 0.089                                   | -3.494            | -2.563  | AhSS7               | -4.917             | 30.202                                  | 4.917             | 0.905   | AhSS7               | -2.606             | 6.090                                   | 2.606             | 0.376   |

**D** **E** **F**

| TG37A (S2 vs S1) |                    |                                         |                   |         | TG37A (Leaf vs Seed) |                    |                                         |                   |         | GG7 (S2 vs S1) |                    |                                         |                   |         |
|------------------|--------------------|-----------------------------------------|-------------------|---------|----------------------|--------------------|-----------------------------------------|-------------------|---------|----------------|--------------------|-----------------------------------------|-------------------|---------|
| Gene             | $\Delta\Delta C_T$ | Fold Change ( $2^{-\Delta\Delta C_T}$ ) | log 2 Fold Change |         | Gene                 | $\Delta\Delta C_T$ | Fold Change ( $2^{-\Delta\Delta C_T}$ ) | log 2 Fold Change |         | Gene           | $\Delta\Delta C_T$ | Fold Change ( $2^{-\Delta\Delta C_T}$ ) | log 2 Fold Change |         |
|                  |                    |                                         | qPCR              | RNA-Seq |                      |                    |                                         | qPCR              | RNA-Seq |                |                    |                                         | qPCR              | RNA-Seq |
| AhGolS4          | 4.429              | 0.046                                   | -4.429            | -4.225  | AhGolS4              | 2.880              | 0.136                                   | -2.880            |         | AhGolS4        | 2.614              | 0.163                                   | -2.614            | -1.329  |
| AhGolS6          | 1.232              | 0.426                                   | -1.232            | -0.591  | AhGolS6              | 5.596              | 0.021                                   | -5.596            |         | AhGolS6        | -3.350             | 10.198                                  | 3.350             | 2.722   |
| AhRS14           | -2.552             | 5.863                                   | 2.552             | 1.375   | AhRS14               | 7.312              | 0.006                                   | -7.312            |         | AhRS14         | -2.468             | 5.533                                   | 2.468             | 3.140   |
| AhRS4            | -3.060             | 8.341                                   | 3.060             | 1.399   | AhRS4                | -1.257             | 2.390                                   | 1.257             |         | AhRS4          | -0.958             | 1.942                                   | 0.958             | 2.336   |
| AhRS6            | -0.070             | 1.050                                   | 0.070             | -0.547  | AhRS6                | 14.025             | 0.000                                   | -14.025           |         | AhRS6          | -1.694             | 3.236                                   | 1.694             | 1.540   |
| AY7U99           | 0.430              | 0.742                                   | -0.430            | 1.896   | AY7U99               | 0.548              | 0.684                                   | -0.548            |         | AY7U99         | 1.460              | 0.363                                   | -1.460            | 0.000   |
| AhRS8            | -1.517             | 2.862                                   | 1.517             | -2.674  | AhRS8                | 2.220              | 0.215                                   | -2.220            |         | AhRS8          | -3.473             | 11.101                                  | 3.473             | 2.339   |
| AhRS3            | 0.548              | 0.684                                   | -0.548            | -2.608  | AhRS3                | 2.217              | 0.215                                   | -2.217            |         | AhRS3          | -3.491             | 11.244                                  | 3.491             | 3.004   |
| AhSS7            | 2.383              | 0.192                                   | -2.383            | -1.792  | AhSS7                | 3.566              | 0.084                                   | -3.566            |         | AhSS7          | -2.339             | 5.060                                   | 2.339             | 1.199   |

**G** **H** **I**

| GG7 (Leaf vs Seed) |                    |                                         |                   |         | Girnar2 (S2 vs S1) |                    |                                         |                   |         | Girnar2 (Leaf vs Seed) |                    |                                         |                   |         |
|--------------------|--------------------|-----------------------------------------|-------------------|---------|--------------------|--------------------|-----------------------------------------|-------------------|---------|------------------------|--------------------|-----------------------------------------|-------------------|---------|
| Gene               | $\Delta\Delta C_T$ | Fold Change ( $2^{-\Delta\Delta C_T}$ ) | log 2 Fold Change |         | Gene               | $\Delta\Delta C_T$ | Fold Change ( $2^{-\Delta\Delta C_T}$ ) | log 2 Fold Change |         | Gene                   | $\Delta\Delta C_T$ | Fold Change ( $2^{-\Delta\Delta C_T}$ ) | log 2 Fold Change |         |
|                    |                    |                                         | qPCR              | RNA-Seq |                    |                    |                                         | qPCR              | RNA-Seq |                        |                    |                                         | qPCR              | RNA-Seq |
| AhGolS4            | 2.152              | 0.225                                   | -2.152            |         | AhGolS4            | -1.320             | 2.496                                   | 1.320             | 0.214   | AhGolS4                | 0.500              | 0.707                                   | -0.500            |         |
| AhGolS6            | 4.949              | 0.032                                   | -4.949            |         | AhGolS6            | -2.206             | 4.614                                   | 2.206             | 2.616   | AhGolS6                | 6.724              | 0.009                                   | -6.724            |         |
| AhRS14             | 2.243              | 0.211                                   | -2.243            |         | AhRS14             | -5.994             | 63.726                                  | 5.994             | 6.876   | AhRS14                 | 11.710             | 0.000                                   | -11.710           |         |
| AhRS4              | -2.165             | 4.485                                   | 2.165             |         | AhRS4              | -4.820             | 28.254                                  | 4.820             | 6.807   | AhRS4                  | 2.583              | 0.167                                   | -2.583            |         |
| AhRS6              | 14.878             | 0.000                                   | -14.878           |         | AhRS6              | -0.377             | 1.298                                   | 0.377             | 0.966   | AhRS6                  | 6.946              | 0.008                                   | -6.946            |         |
| AY7U99             | -5.225             | 37.409                                  | 5.225             |         | AY7U99             | -2.267             | 4.812                                   | 2.267             | 0.410   | AY7U99                 | 8.415              | 0.003                                   | -8.415            |         |
| AhRS8              | 0.293              | 0.816                                   | -0.293            |         | AhRS8              | -2.087             | 4.249                                   | 2.087             | 1.058   | AhRS8                  | 3.003              | 0.125                                   | -3.003            |         |
| AhRS3              | 0.723              | 0.606                                   | -0.723            |         | AhRS3              | -1.391             | 2.622                                   | 1.391             | 0.769   | AhRS3                  | 4.230              | 0.053                                   | -4.230            |         |
| AhSS7              | 10.517             | 0.001                                   | -10.517           |         | AhSS7              | -0.029             | 1.020                                   | 0.029             | 0.670   | AhSS7                  | 9.385              | 0.001                                   | -9.385            |         |

**J** **K** **L**

**Fig. S5. Analysis of peanut tissue samples under different combinations of contrast genotype for determination of expression. A.** Maturing seed stage (S1) of High RFOs variety (TG37A) vs Low RFOs variety (GG7), **B.** Matured seed stage (S2) of High RFOs variety (TG37A) vs Low RFOs variety (GG7), **C.** High RFOs variety of Spanish group (TG37A) vs Virginia group (Girnar 2) at maturing seed (S1) stage, **D.** High RFOs variety of Spanish group (TG37A) vs Virginia group (Girnar 2) at matured seed (S2) stage, **E.** High RFOs Virginia variety (Girnar 2) vs Low RFOs Spanish variety (GG7) at maturing seed (S1) stage, **F.** High RFOs Virginia variety (Girnar 2) vs Low RFOs Spanish variety (GG7) at matured seed (S2) stage, **G.** High RFO cultivar (TG37A) matured seed (S2) vs maturing seed (S1) stage, **H.** High RFO Spanish cultivar (TG37A) leaf vs seed, **I.** low RFO cultivar (GG7) matured seed (S2) vs maturing seed (S1) stage, **J.** Low RFO Spanish cultivar (GG7) leaf vs seed, **K.** High RFO Virginia Cultivar (Girnar 2) matured seed (S2) vs maturing seed (S1) stage, **L.** High RFO Virginia Cultivar (Girnar 2) leaf vs seed.

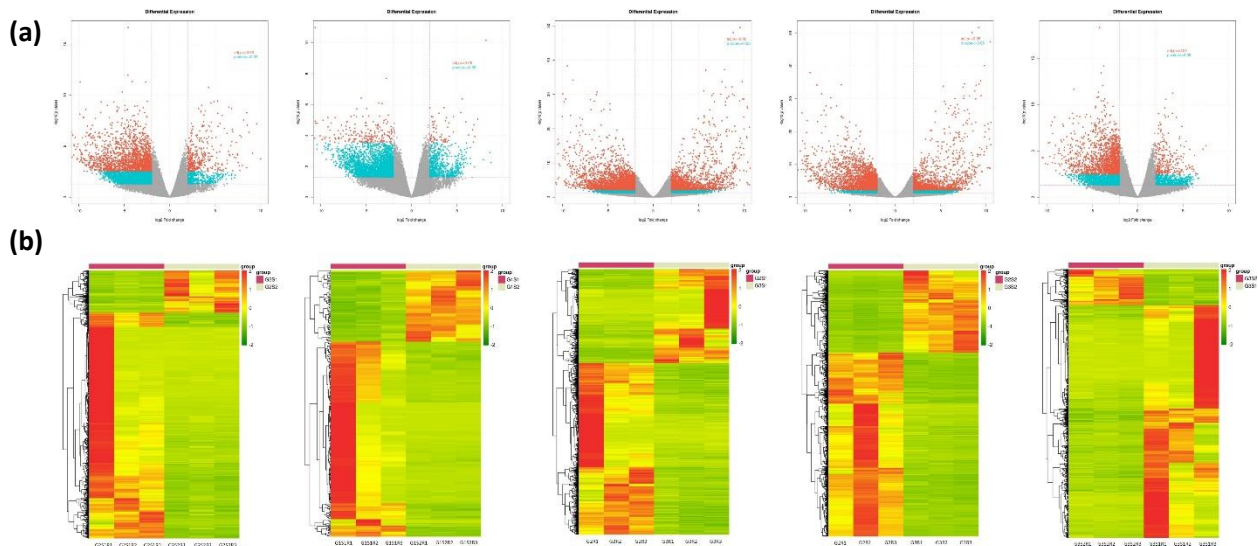

**Fig. S6. Expression profile of the significant differentially expressed genes across the contrast genotypes.** (a) Volcano plot showing differential expression profile of genes. Blue indicates  $\log_2$  fold change  $\geq 2$  and  $p$  value  $\leq 0.05$ . “Red” dots indicate absolute  $\log_2$  fold change  $\geq 2$  and FDR/adjusted  $p$  value  $\leq 0.05$ . From left to right, Girmar 2 (S2 vs S1), GG7 (S2 vs S1), Girmar 2 vs TG37A (S1), Girmar 2 vs TG37A (S2), TG37A (S2 vs S1). (b) Heatmap showing the DEGs in Girmar 2 (S2 vs S1), GG7 (S2 vs S1), Girmar 2 vs TG37A (S1), Girmar 2 vs TG37A (S2), TG37A (S2 vs S1) (*left to right*). R1, R2, R3 represent the three replications.
